# Supplementary material
Source: PubMed Central journal article supplement (PMC5916253)
Supplement: jciinsight-3-96724-s001.pdf [file jciinsight-3-96724-s001.pdf]

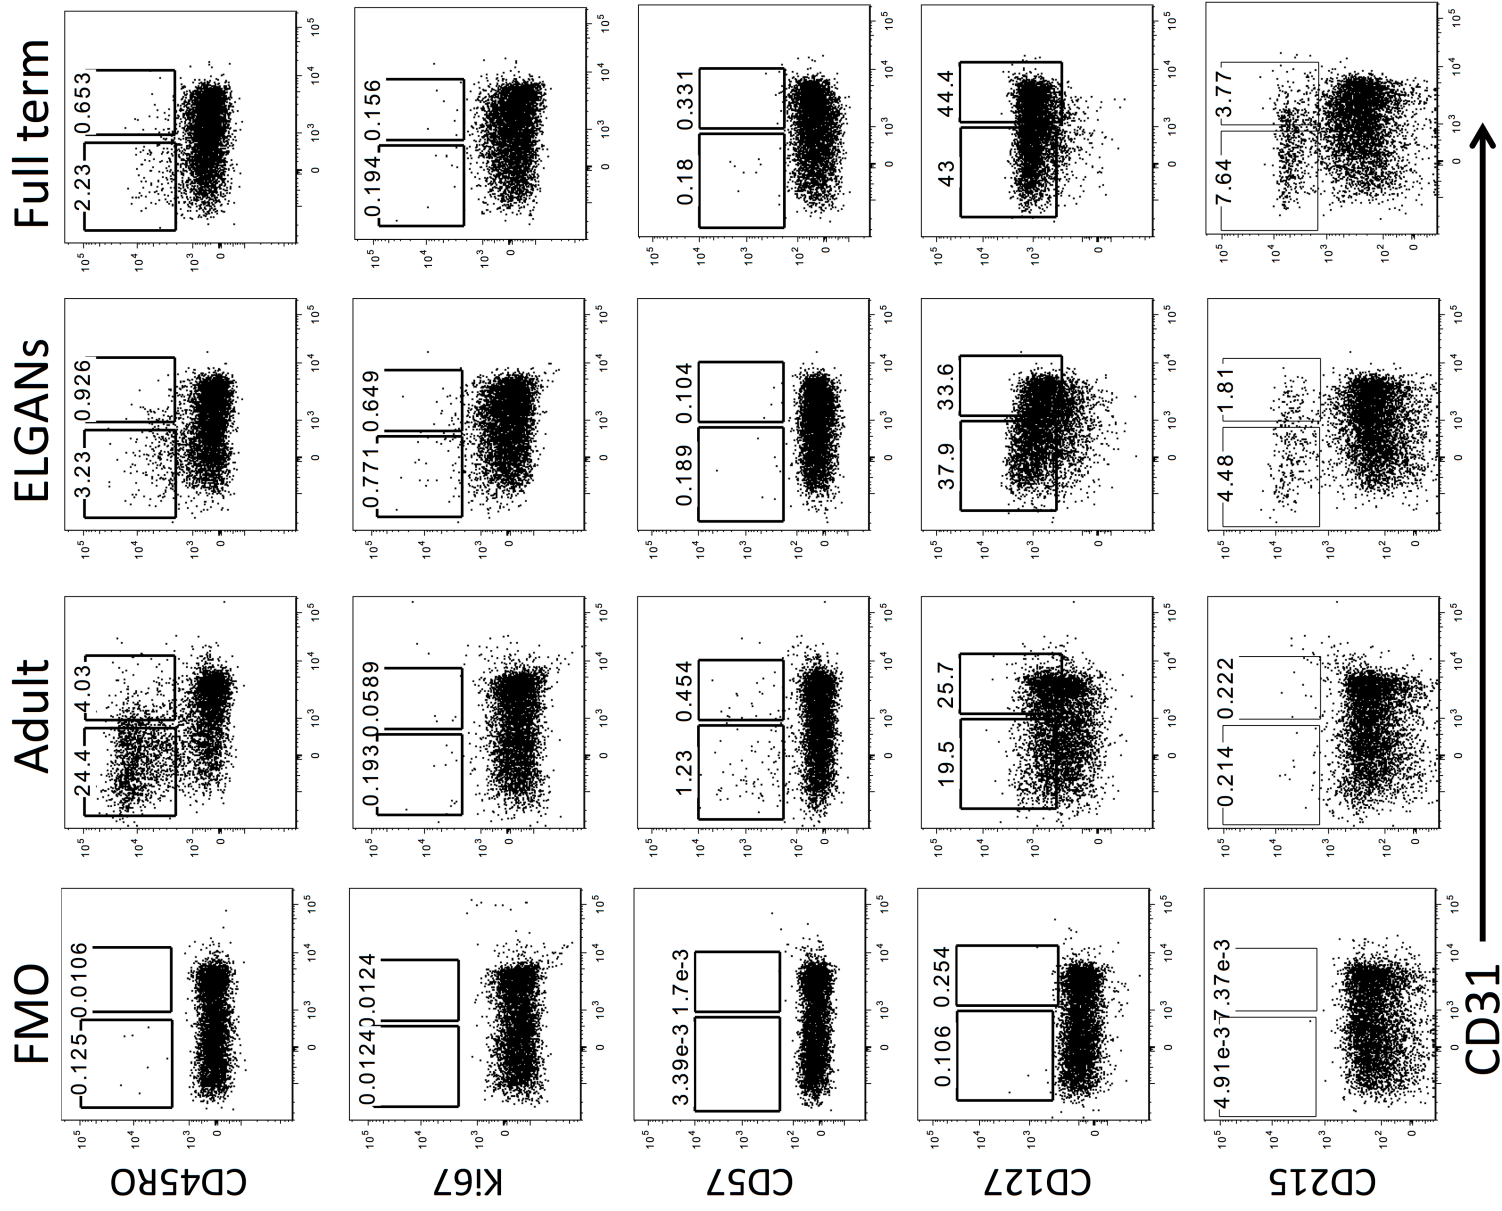

**Supplementary Figure 1:** Representative flow cytometry plots for each cohort, showing co-staining of CD31, including fluorescence-minus-one control (FMO). ELGANS=extremely low gestational age neonate (born <29 weeks gestational age).

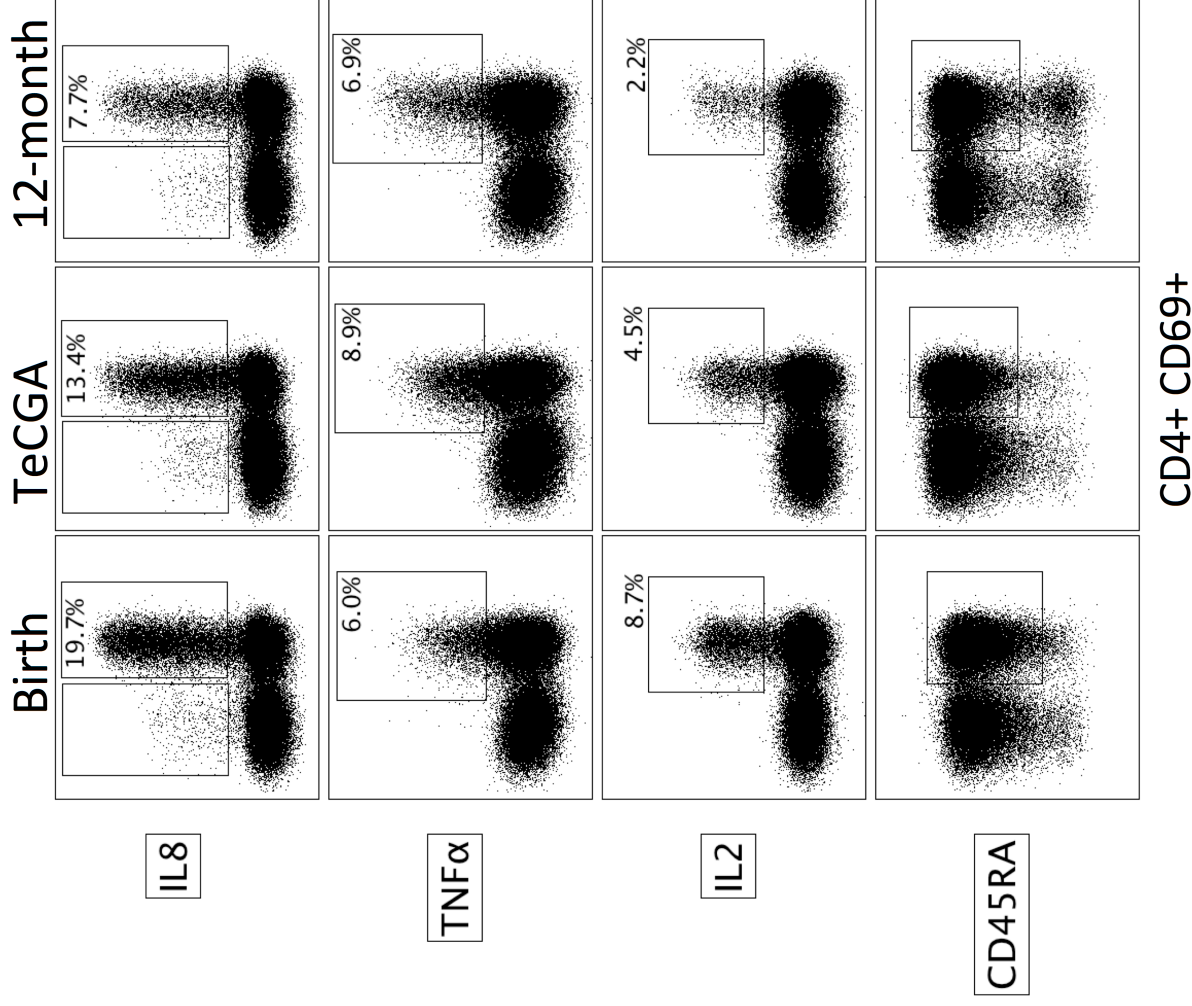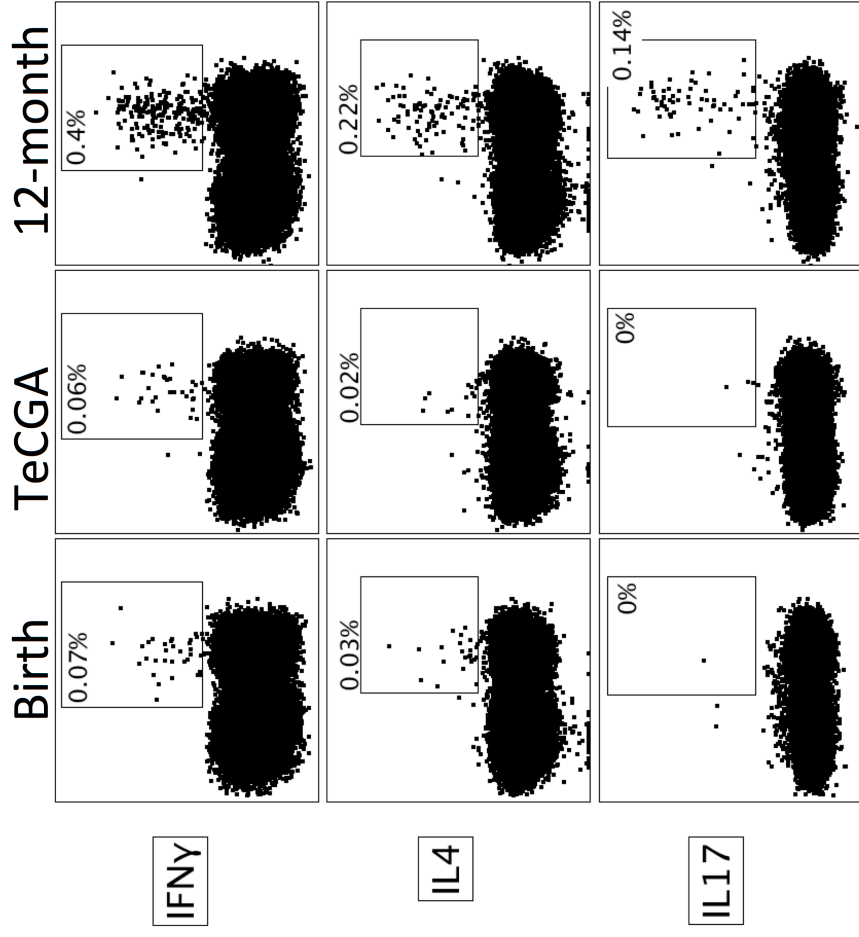

**Supplementary Figure 2: Representative flow plots from representative study subject showing changing frequencies of cytokine for all three time points.** Umbilical cord blood or PBMC's were stimulated with Staphylococcal enterotoxin B (SEB) in vitro for 2 hours, then in the presence of Golgi blockade for an additional 8 hours. Events shown have been gated based on FSC/SSC/Live/CD14<sup>-</sup>/CD3<sup>+</sup>/CD8<sup>-</sup>/CD4<sup>+</sup> marker expression. TeCGA=term-equivalent corrected gestational age (collected when neonate aged to 36-42 weeks post-menstrual age)

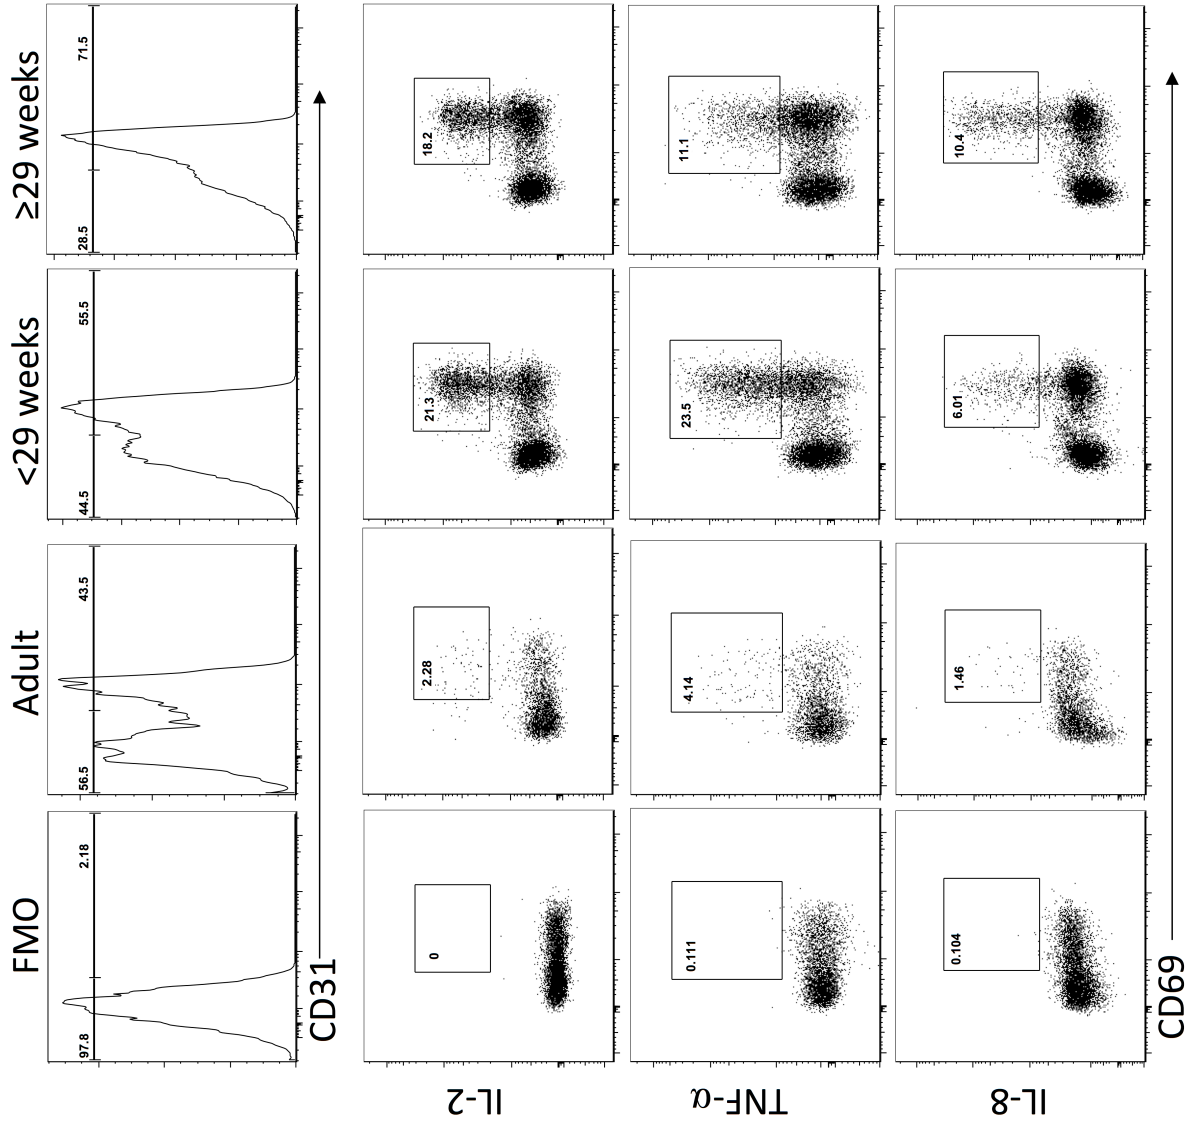

**Supplementary Figure 3:**  
**Representative flow cytometry plots using co-staining panel for CD31 and intracellular cytokine staining.** Umbilical cord blood or adult PBMC's were stimulated with Staphylococcal enterotoxin B (SEB) in vitro for 2 hours, then in the presence of Golgi blockade for an additional 8 hours. Events shown have been gated based on FSC/SSC/Live/CD14-/CD3+/CD8- marker expression.

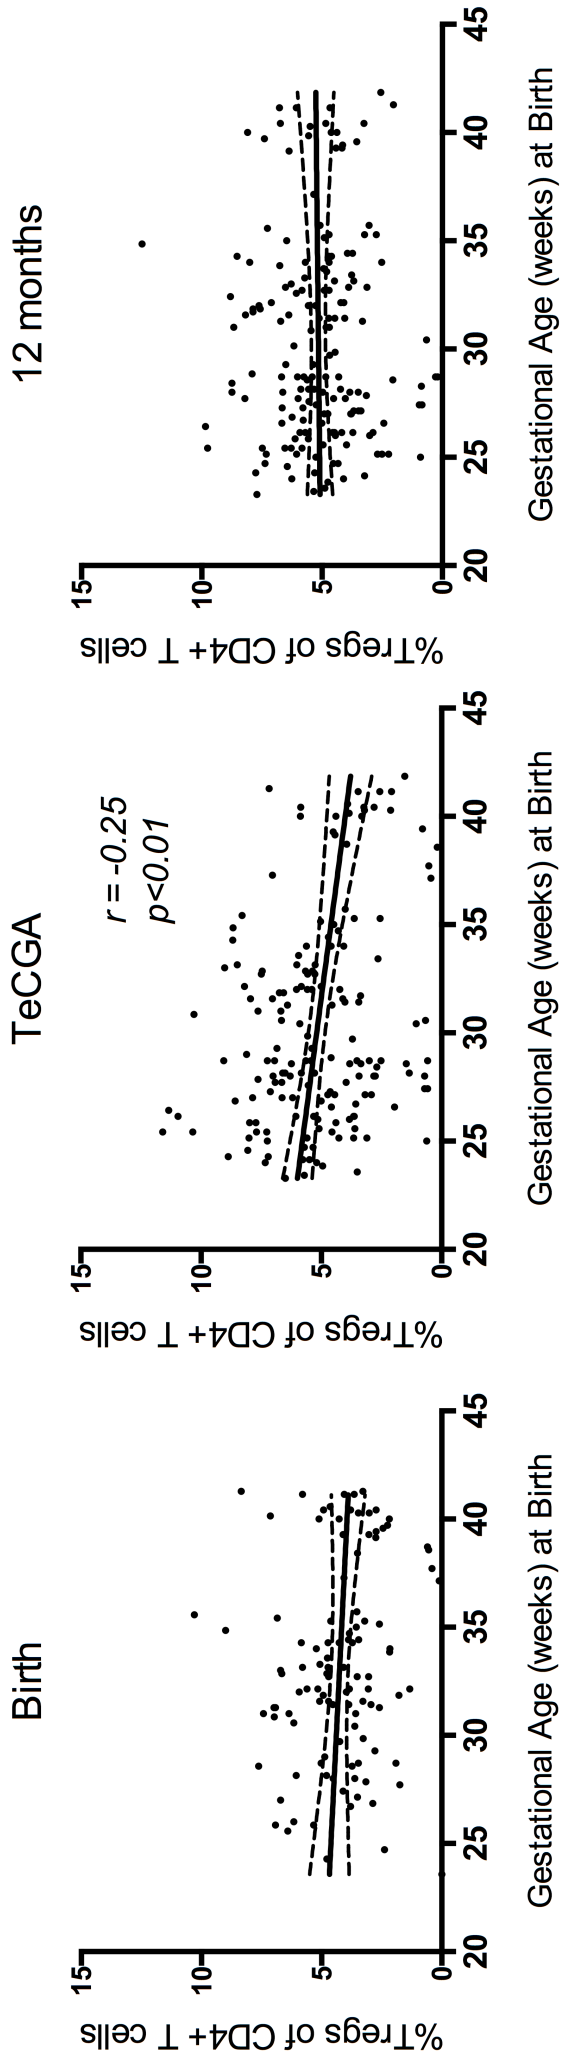

**Supplementary Figure 4: Tregs are greater in former premature infants at term corrected age, but do not associate with CD31+ T cell frequencies or with PRD.** Tregs were identified based on sequential gating of FSC/SSC/Live, CD14-/CD3+/CD8-/CD4+/FOXP3 high/CD127low. Plots show Tregs as a fraction of CD4 at given gestational age at birth, collected at birth, term-equivalent corrected gestational age (teCGA) and 12 month time points. There was no association with post-prematurity respiratory disease (PRD) or with CD31+ T cell frequencies (Spearman correlation).

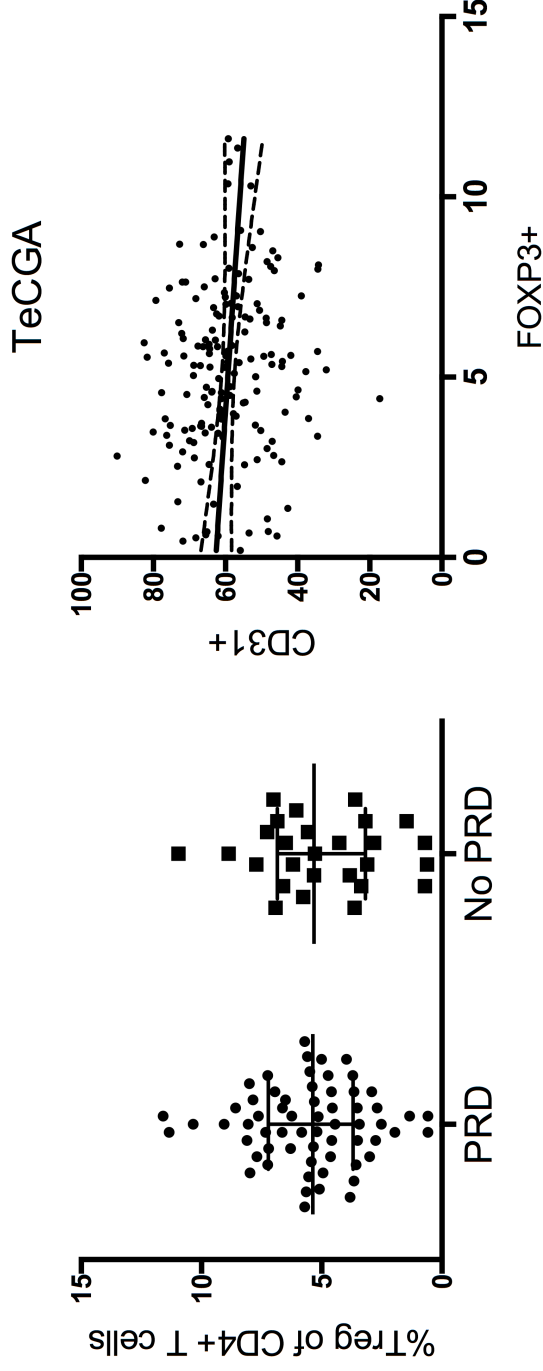



|                                                                  | Birth Gestational Age<br>< 29 weeks (N=122) | Birth Gestational Age<br>≥ 29 weeks (N=111) |
|------------------------------------------------------------------|---------------------------------------------|---------------------------------------------|
| Gestational Age at birth (mean (SD))                             | 26.6 (1.6)                                  | 34.4 (3.52)                                 |
| Gender (N (%))                                                   |                                             |                                             |
| Male                                                             | 55 (45.1%)                                  | 62 (55.9%)                                  |
| Female                                                           | 67 (54.9%)                                  | 49 (44.1%)                                  |
| Race (N (%))                                                     |                                             |                                             |
| White                                                            | 74 (60.7)                                   | 71 (64.0%)                                  |
| >1 race                                                          | 2 (1.6%)                                    | 3 (2.7%)                                    |
| Black/AA                                                         | 39 (32.0%)                                  | 30 (27.0%)                                  |
| Asian                                                            | 3 (2.5%)                                    | 0                                           |
| Other                                                            | 4 (3.3%)                                    | 6 (5.4%)                                    |
| Unknown                                                          | 0                                           | 1 (0.9%)                                    |
| Ethnicity (N (%))                                                |                                             |                                             |
| Not Hispanic                                                     | 113 (92.6%)                                 | 104 (93.7%)                                 |
| Hispanic                                                         | 9 (7.4%)                                    | 7 (6.3%)                                    |
| Funisitis* (N(%))                                                |                                             |                                             |
| Yes                                                              | 23 (18.9%)                                  | 9 (8.1%)                                    |
| No                                                               | 86 (70.5%)                                  | 83 (74.8%)                                  |
| No placental pathology available                                 | 13 (10.7%)                                  | 19 (17.1%)                                  |
| Clinical Chorioamnionitis* (N(%))                                |                                             |                                             |
| Yes                                                              | 18 (14.8%)                                  | 11 (9.9%)                                   |
| No                                                               | 104 (85.2%)                                 | 100 (90.1%)                                 |
| Antenatal steroid (N(%))                                         |                                             |                                             |
| Yes                                                              | 99 (81.1%)                                  | 56 (50.5%)                                  |
| No                                                               | 23 (18.9%)                                  | 55 (49.5%)                                  |
| Pre-eclampsia (N(%))                                             |                                             |                                             |
| Yes                                                              | 16 (13.1%)                                  | 31 (27.9%)                                  |
| No                                                               | 106 (86.9%)                                 | 80 (72.1%)                                  |
| Culture Positive Sepsis or Bell's Stage >2 NEC (N(%))            |                                             |                                             |
| No                                                               | 85 (69.7%)                                  | 104 (93.7%)                                 |
| Yes                                                              | 37 (30.3%)                                  | 7 (6.3%)                                    |
| Bronchopulmonary Dysplasia (modified Shennan definition§) (N(%)) |                                             |                                             |
| Yes                                                              | 54 (44.3%)                                  | 4 (3.6%)                                    |
| No                                                               | 68 (55.7%)                                  | 107 (96.4%)                                 |
| Postnatal steroids (N(%))                                        |                                             |                                             |
| No                                                               | 76 (62.3%)                                  | 109 (98.2%)                                 |
| Yes                                                              | 46 (37.7%)                                  | 2 (1.8%)                                    |
| PDA requiring surgical ligation (N(%))                           |                                             |                                             |
| Yes                                                              | 21 (17.2%)                                  | 0                                           |
| No                                                               | 101 (82.8%)                                 | 111 (100%)                                  |
| Days on mechanical ventilation¶ (median (IQR))                   | 15.0 (36.0)                                 | 0 (0.75)                                    |
| Post-prematurity Respiratory Disease (PRD)                       | 86 (71%)                                    | 43 (39%)                                    |

**Supplementary Table 1:** Subject demographics, grouped by gestational age at birth

\*Clinical chorioamnionitis diagnosed by Attending Obstetrician, per ACOG guidelines, typically including at least two of the following: maternal intrapartum fever, maternal or fetal tachycardia, fundal tenderness, purulent/foul-smelling amniotic fluid, maternal leukocytosis. §Bronchopulmonary Dysplasia diagnosed when oxygen requirement >21% at 36 weeks post-menstrual age (PMA) or at discharge if baby was discharged prior to 36 weeks PMA. ¶Days on mechanical ventilation equals the sum of days requiring positive pressure mechanical ventilation breaths (endotracheal or rate provided via non-invasive positive pressure).

| Fluorochrome   | Panel 1 |            | Panel 2 |            | Panel 3 |            |
|----------------|---------|------------|---------|------------|---------|------------|
|                | Marker  | Clone#     | Marker  | Clone#     | Marker  | Clone#     |
| FITC           | CD127   | HIL-7R-M21 | IL-8    | E8N1       | IL-8    | E8N1       |
| APC-CY7        |         |            | CD69    | FN50       | CD69    | FN50       |
| APC-eFluor 780 | CCR7    | 3D12       |         |            |         |            |
| Alexa 700      | Ki-67   | B56        | CD3     | UCHT1      | IL-2    | MQI-17H12  |
| APC            |         |            | IL-6    | MQ2-13A5   | CD8     | RPA-T8     |
| eFluor 660     | FOXP3   | 236A/E7    |         |            |         |            |
| Qdot 800       | CD14    | Tük4       |         |            |         |            |
| BV785          |         |            | TNFa    | MAb11      | TNFa    | Mab11      |
| Qdot 705       | CD8     | 3B5        |         |            |         |            |
| BV711          |         |            | IL-10   | JES3-9D7   | IL-10   | JES3-9D7   |
| Qdot 655       | CD27    | CLB-27/1   |         |            |         |            |
| BV605          |         |            | CD45RA  | HI100      | CD45RA  | HI100      |
| BV605          | CD25    | 302632     | IL-2    | MQ1-17H12  | CD31    | WM59       |
| BV570          |         |            | CD8a    | RPA-T8     |         |            |
| BV510          |         |            | CD14    | MφP9       |         |            |
| Live/Dead      | Aqua    | Cat#L34957 | Aqua    | Cat#L34957 | Yellow  | Cat#L34959 |
| PacBlue        | CD3     | S4.1       | IL-17   | BL168      | CD3     | S4.1       |
| PE-Cy7         | CD31    | WM59       | IFN-g   | B27        | IFN-g   | B27        |
| PE-Cy5.5       | CD4     | S3.5       | CD4     | S3.5       |         |            |
| PE-Cy5         | CD45RO  | UCHL1      |         |            | CD56    | MEM-188    |
| PE-CF594       |         |            | CD107a  | H4A3       |         |            |
| PETXR          | CD215   | JM7A4      |         |            | CD4     | S3.5       |
| PE             | CD57    | HCD57      | IL-4    | MP4-25D2   | CD14    | HCD14      |

**Supplementary Table 2:** Combinations of antibody conjugates used for flow cytometry

|                                                                  | No PRD (N=36)           | PRD (N=86)              | PRD v no PRD |                   | CD31 low v                       |
|------------------------------------------------------------------|-------------------------|-------------------------|--------------|-------------------|----------------------------------|
|                                                                  |                         |                         | (p-value)    | %CD31 ≥ 60 (N=36) | %CD31 < 60 (N=49) high (p-value) |
| Gestational age at birth (weeks, median (IQR))                   | 27.1 (2.3)              | 26.6 (2.7)              | 0.84         | 26.6 (2.7)        | 27.0 (2.7) 0.76                  |
| Day of life at discharge (median (IQR))                          | 79.0 (26.0) (3 missing) | 78.0 (38.0) (4 missing) | 0.72         | 84.5 (45.0)       | 78.0 (29.0) 0.89                 |
| Days on mechanical ventilation¶                                  |                         |                         | 0.08         |                   | 1                                |
| ≤15 (median)                                                     | 23 (63.9%)              | 39 (45.4%)              |              | 18 (50.0%)        | 25 (51.0%)                       |
| >15                                                              | 13 (36.1%)              | 47 (54.7%)              |              | 18 (50.0%)        | 24 (49.0%)                       |
| Supplemental oxygen exposure day 7 (area under curve∞)           |                         |                         | 0.03         |                   | 1                                |
| ≤925 (median)                                                    | 24 (66.7%)              | 37 (43.0%)              |              | 17 (47.2%)        | 24 (49.0%)                       |
| >925                                                             | 12 (33.3%)              | 49 (57.0%)              |              | 19 (52.8%)        | 25 (51.0%)                       |
| Supplemental oxygen exposure day 14 (area under curve)           |                         |                         | 0.03         |                   | 0.39                             |
| ≤2369 (median)                                                   | 24 (66.7%)              | 37 (43.0%)              |              | 19 (52.8%)        | 21 (42.9%)                       |
| >2369                                                            | 12 (33.3%)              | 49 (57.0%)              |              | 17 (47.2%)        | 28 (57.1%)                       |
| Gender (N (%))                                                   |                         |                         | 0.69         |                   | 0.0004                           |
| Female                                                           | 21 (58.3%)              | 46 (53.5%)              |              | 27 (75.0%)        | 17 (34.7%)                       |
| Male                                                             | 15 (41.7%)              | 40 (46.5%)              |              | 9 (25.0%)         | 32 (65.3%)                       |
| Race (N (%))                                                     |                         |                         | 0.34         |                   | 0.14                             |
| White                                                            | 21 (58.3%)              | 53 (43.4%)              |              | 20 (55.6%)        | 34 (69.4%)                       |
| Black/AA                                                         | 10 (27.8%)              | 29 (33.7%)              |              | 11 (30.6%)        | 14 (28.6%)                       |
| Asian                                                            | 2 (5.6%)                | 1 (1.2%)                |              | 3 (8.3%)          | 0                                |
| Other                                                            | 2 (5.6%)                | 2 (2.3%)                |              | 2 (5.6%)          | 1 (2.0%)                         |
| Ethnicity (N (%))                                                |                         |                         |              |                   | 1                                |
| Not Hispanic                                                     | 32 (88.9%)              | 81 (94.2%)              | 0.45         | 34 (94.4%)        | 46 (93.9%)                       |
| Hispanic                                                         | 4 (11.1%)               | 5 (5.8%)                |              | 2 (5.6%)          | 3 (6.1%)                         |
| Funisitis# (N(%))                                                |                         |                         |              |                   | 0.3                              |
| No                                                               | 24 (66.7%)              | 62 (72.1%)              | 0.81         | 26 (72.2%)        | 33 (67.4%)                       |
| Yes                                                              | 8 (22.2%)               | 15 (17.4%)              |              | 8 (22.2%)         | 8 (16.3%)                        |
| Placental pathology not available                                | 4 (11.1%)               | 9 (10.5%)               |              | 2 (5.6%)          | 8 (16.3%)                        |
| Clinical Chorioamnionitis* (N(%))                                |                         |                         |              |                   | 0.77                             |
| No                                                               | 29 (80.6%)              | 75 (87.2%)              | 0.4          | 30 (83.3%)        | 42 (85.7%)                       |
| Yes                                                              | 7 (19.4%)               | 11 (12.8%)              |              | 6 (16.7%)         | 7 (14.3%)                        |
| Antenatal steroids (N(%))                                        |                         |                         |              |                   | 1                                |
| No                                                               | 5 (13.9%)               | 18 (20.9%)              | 0.45         | 8 (22.2%)         | 10 (20.4%)                       |
| Yes                                                              | 31 (86.1%)              | 68 (79.1%)              |              | 28 (77.8%)        | 39 (79.6%)                       |
| Pre-eclampsia (N(%))                                             |                         |                         |              |                   | 0.047                            |
| No                                                               | 30 (83.3%)              | 76 (88.4%)              | 0.56         | 28 (77.8%)        | 46 (93.9%)                       |
| Yes                                                              | 6 (16.7%)               | 10 (11.6%)              |              | 8 (22.2%)         | 3 (6.1%)                         |
| Culture Positive Sepsis or Bell's Stage >2 NEC (N(%))            |                         |                         |              |                   | 0.64                             |
| No                                                               | 26 (72.2%)              | 59 (68.6%)              | 0.83         | 24 (66.7%)        | 35 (71.4%)                       |
| Yes                                                              | 10 (27.8%)              | 27 (31.4%)              |              | 12 (33.3%)        | 14 (28.6%)                       |
| Bronchopulmonary Dysplasia (modified Shennan definition§) (N(%)) |                         |                         |              |                   | 0.27                             |
| No                                                               | 25 (69.4%)              | 43 (50.0%)              | 0.07         | 22 (61.1%)        | 23 (46.9%)                       |
| Yes                                                              | 11 (30.6%)              | 43 (50.0%)              |              | 14 (38.9%)        | 26 (53.1%)                       |
| Postnatal steroids (N(%))                                        |                         |                         |              |                   | 1                                |
| No                                                               | 29 (80.6%)              | 47 (54.7%)              | 0.008        | 23 (63.9%)        | 32 (65.3%)                       |
| Yes                                                              | 7 (19.4%)               | 39 (45.4%)              |              | 13 (36.1%)        | 17 (34.7%)                       |
| PDA requiring surgical ligation (N(%))                           |                         |                         |              |                   | 0.25                             |
| No                                                               | 30 (83.3%)              | 71 (82.6%)              | 1            | 28 (77.8%)        | 43 (87.8%)                       |
| Yes                                                              | 6 (16.7%)               | 15 (17.4%)              |              | 8 (22.2%)         | 6 (12.2%)                        |

**Supplementary Table 3:** Univariate comparisons of clinical variables in <29 week subjects with and without post-prematurity respiratory disease (PRD), and in <29 week subjects above (high) and below median CD31+CD4+ T cell frequency at term corrected age

¶Days on mechanical ventilation equals the sum of days requiring positive pressure mechanical ventilation breaths (endotracheal or rate provided via non-invasive positive pressure). ∞Oxygen area under the curve calculated based on methods established by Stevens et al (2010) over a selected duration (seven and 14 days). #Funisitis defined as leukocyte infiltration in the perivascular region of the umbilical cord. \*Clinical chorioamnionitis diagnosed by Attending Obstetrician, per ACOG guidelines, typically including at least two of the following: maternal intrapartum fever, maternal or fetal tachycardia, fundal tenderness, purulent/foul-smelling amniotic fluid, maternal leukocytosis. §Bronchopulmonary Dysplasia diagnosed when oxygen requirement >21% at 36 weeks post-menstrual age (PMA) or at discharge if baby was discharged prior to 36 weeks PMA.

|                                  | Odds Ratio (95% CI) | p-value, Odds Ratio | Sensitivity (% (CI)) | Specificity (% (CI)) | Error Rate (% (CI)) |
|----------------------------------|---------------------|---------------------|----------------------|----------------------|---------------------|
| Continuous                       |                     |                     |                      |                      |                     |
| All subjects (n=233)             | 0.82 (0.77, 0.88)   | <0.0001             |                      |                      |                     |
| <b>&lt;29 weeks only (n=122)</b> | <b>0.96</b>         | <b>0.71</b>         |                      |                      |                     |
| Dichotomized                     |                     |                     |                      |                      |                     |
| <33 weeks v ≥33 weeks            | 6.267 (3.2, 12.16)  | <0.0001             | 88.4 (81.6, 93.3)    | 45.2 (35.4, 55.3)    | 30.9 (25.0, 37.3)   |
| <29 weeks v ≥29 weeks            | 3.78 (2.19, 6.52)   | <0.0001             | 66.7 (57.8, 74.7)    | 65.4 (55.4, 74.5)    | 33.9 (27.9, 40.4)   |

**Supplemental Table 4:** Performance of gestational age in predicting post-prematurity respiratory disease in neonates
